# Supplementary material for: Cloning and Characterization of a Novel Drosophila Stress Induced DNase
Source: PubMed Central journal article supplement (PMC4118900; doi:10.1371/journal.pone.0103564), 2014-08-01
Supplement: pone.0103564.s001.pdf [file pone.0103564.s001.pdf]

**A)**

M P D L K Y M L **T I L S L Y F F V G S V Q A N C** L I D L A H L N A  
 N Y V Y L S Q N N G V Y D I Q R S D I V E I H Q T L Y L L C N G G  
 L H R T T F L C R Y D S V F S P A L S S A A C A P P D P V V V K V  
 P D T S C S I P S A T F A V G F S F N G R F M E L Y R N C F D G Y  
 S L A F Q H S I Y K A Y R Y V N T V P R P N P T W Q S D Q L S G G  
 F D N A Y E G R A T Q A C L L T N L G A V Q P Q C K F D **R G H** M T  
 P A S A F I S T E L K K S T F R Y L N A I P Q Y R G V N R G K W K  
 A V E T W V N N M V R G L Y D N P I I N N V Q I P R T Y D V L K V  
 C I G A L G V H R L R H N T N N N M I P I Y L L D N N K I P V P E  
 W M Y K I V S H L S G D K W V M L T Y N D V S L P N Q Q A L N Q I  
 C H V I P C H P G L N L N T K D V G H T V C C D P Y R F I T I N A  
 P H L T G V C

**B)**

| Name         |                                                                                                                                                                                                                                                                                                                                               | E value  |
|--------------|-----------------------------------------------------------------------------------------------------------------------------------------------------------------------------------------------------------------------------------------------------------------------------------------------------------------------------------------------|----------|
| CG9989 (SID) | 1 -----MPDLKYM <b>L</b> TILSLYFFV                                                                                                                                                                                                                                                                                                             | 0        |
| CG12917      | 1 -----MKIAPMDCSYITLFLYIYFICFLAWE                                                                                                                                                                                                                                                                                                             | 2.3 e-26 |
| CG14062      | 1 -----MLRILLLLLAFCAL                                                                                                                                                                                                                                                                                                                         | 1.9 e-22 |
| CG14120      | 1 -----MWSNRCSIFILALLVASGAVKVSGRLLPRILPESLAEGDEGVTVRGDCCEFK                                                                                                                                                                                                                                                                                   | 7.8 e-7  |
| CG3819       | 1 ----MKCLVLIASFGLFLAS-----AQARILPAEDLPWELPEVPVAVNEIEPRAAG                                                                                                                                                                                                                                                                                    | 5.7 e-6  |
| CG14118      | 1 MMLQFIGLILAVVILREIRAREAIATIPDVGQIIKDLGLHIDGEMFHQGSPCRVDVQND                                                                                                                                                                                                                                                                                 | 5.9 e-6  |
| CG6839       | 1 ----MKCIRFSLLVVGLLAAPAAWARVPCPEVELPPVVEDDGIFERLAVAPPQPVGRAGA                                                                                                                                                                                                                                                                                | 4.4 e-4  |
|              |                                                                                                                                                                                                                                                                                                                                               |          |
| CG9989       | 18 GSVQANCLIDL <b>AHLN</b> ANYVYLSQNNGVYDIQRSDIVEIHQ <b>TLYLLCN</b> -----GGLHRT--                                                                                                                                                                                                                                                             |          |
| CG12917      | 27 VHGDCQILQYMVEQSN <b>GTFTYRDASGSIQLQRLET</b> VPSGV <b>TLLVYCS</b> -----PSVFKETV                                                                                                                                                                                                                                                             |          |
| CG14062      | 15 AHGQCRF <b>TRAQVQGTNRIFMVRGQNRQLSKRTASSAVGETLQ</b> MWCN-----PRDIVATF                                                                                                                                                                                                                                                                       |          |
| CG14120      | 51 VNGDLNDPAPLFSRHNSY---EII <b>VPDPTD</b> TVRLVNGELLDMFCPGVGF <b>AAPFVNRWQVT</b>                                                                                                                                                                                                                                                              |          |
| CG3819       | 48 CSIKIR <b>SSELKDPQPLLIKSDTSEIVGFSDTGYVDV</b> DKDTIEFH <b>CTSSLASPLSGKSVT</b>                                                                                                                                                                                                                                                               |          |
| CG14118      | 61 LPRLDKVQPL <b>YLRPGTDLYWLPNAYGHLEVQR</b> GASIELHCSHSF <b>APANGESLDAKLRSIR</b>                                                                                                                                                                                                                                                              |          |
| CG6839       | 57 CSV <b>TIRGG</b> -LPSPEPVY <b>LKTDSEDFYPFSDVGVMEFESGGSTQLWC</b> PSGF <b>NTHSENLLTT</b>                                                                                                                                                                                                                                                     |          |
|              |                                                                                                                                                                                                                                                                                                                                               |          |
| CG9989       | 72 FLCRYD <b>S</b> V <b>F</b> SPALSS <b>A</b> ACAPPDP-----VVVKVPD <b>TSCS</b> IPS-----AT <b>F</b> AVG <b>F</b> SFNG-                                                                                                                                                                                                                          |          |
| CG33346      | 1 -----MYLVGF <b>KYGN</b> -                                                                                                                                                                                                                                                                                                                   | 1.2 e-42 |
| CG12917      | 82 QDN--G <b>Q</b> FSVPL <b>P</b> MRC <b>L</b> SP <b>M</b> Q <b>P</b> -----VTKH <b>IRD</b> GDCAGN-----LYAVG <b>Y</b> TI <b>D</b> G-                                                                                                                                                                                                           |          |
| CG14062      | 70 CQAGR <b>VPA</b> F <b>Q</b> PP <b>L</b> P <b>M</b> T <b>C</b> RA <b>A</b> P <b>A</b> -----IT <b>T</b> P <b>V</b> Q <b>D</b> R <b>R</b> CP <b>A</b> T-----MYR <b>V</b> G <b>Y</b> N <b>V</b> G <b>N</b>                                                                                                                                     |          |
| CG14120      | 108 AT <b>CLQ</b> N <b>K</b> Y <b>L</b> V <b>DD</b> L <b>I</b> Y <b>P</b> E <b>A</b> N <b>E</b> S <b>C</b> -----T <b>A</b> W <b>I</b> F <b>T</b> A <b>L</b> R <b>S</b> G <b>K</b> D <b>C</b> N <b>G</b> G <b>T</b> D <b>L</b> V <b>Q</b> V <b>G</b> F <b>E</b> V <b>E</b> D <b>G</b> G                                                        |          |
| CG3819       | 108 AKCVG <b>GT</b> TE <b>K</b> IDD <b>KE</b> H <b>D</b> L <b>S</b> A <b>T</b> K <b>C</b> -----T <b>S</b> W <b>P</b> V <b>F</b> V <b>G</b> K <b>K</b> S <b>G</b> S <b>S</b> C <b>N</b> G <b>G</b> T <b>L</b> I <b>K</b> V <b>G</b> F <b>E</b> L <b>S</b> G <b>S</b>                                                                           |          |
| CG14118      | 121 VKCVQ <b>DT</b> TE <b>F</b> W <b>M</b> G <b>A</b> K <b>I</b> H <b>F</b> S <b>D</b> F <b>V</b> C <b>N</b> H <b>S</b> M <b>P</b> Y <b>T</b> V <b>E</b> R <b>L</b> D <b>R</b> S <b>C</b> G <b>S</b> D <b>T</b> P <b>S</b> P <b>S</b> T <b>S</b> Y <b>L</b> R <b>V</b> G <b>Y</b> D <b>T</b> G <b>D</b> G                                     |          |
| CG6839       | 115 ASC <b>V</b> S <b>G</b> T <b>F</b> S <b>V</b> G <b>S</b> N <b>E</b> F <b>K</b> D <b>L</b> Y <b>C</b> -----K <b>S</b> W <b>P</b> G <b>F</b> K <b>A</b> V <b>K</b> S <b>G</b> A <b>T</b> C <b>N</b> G <b>G</b> -I <b>V</b> I <b>R</b> V <b>G</b> F <b>E</b> L <b>T</b> S                                                                    |          |
|              |                                                                                                                                                                                                                                                                                                                                               |          |
| CG9989       | 120 R <b>F</b> M <b>E</b> L <b>Y</b> R <b>N</b> C <b>F</b> D <b>G</b> Y <b>S</b> L <b>A</b> F <b>Q</b> H <b>S</b> I <b>Y</b> K <b>A</b> Y <b>R</b> Y <b>V</b> N <b>T</b> V <b>P</b> R--P <b>N</b> P <b>T</b> W <b>Q</b> S-----D <b>Q</b> L <b>S</b> G <b>G</b> F <b>D</b> N                                                                   |          |
| CG33346      | 11 T <b>F</b> M <b>E</b> L <b>Y</b> R <b>S</b> C <b>M</b> D <b>A</b> R <b>T</b> M <b>K</b> A <b>Y</b> F <b>S</b> I <b>N</b> T <b>V</b> Y <b>P</b> T <b>N</b> L <b>K</b> S <b>D</b> R--P <b>P</b> T <b>V</b> E <b>D</b> K <b>D</b> G <b>I</b> I <b>T</b> P <b>A</b> --D <b>E</b> A <b>T</b> E <b>Q</b> M <b>N</b> S                            |          |
| CG12917      | 126 K <b>D</b> L <b>E</b> L <b>Y</b> R <b>T</b> C <b>F</b> D <b>C</b> G <b>Q</b> G <b>R</b> L <b>V</b> Y <b>S</b> Q <b>S</b> D <b>V</b> Y <b>K</b> T <b>F</b> F <b>P</b> K <b>R</b> --P <b>F</b> V <b>E</b> F <b>V</b> A <b>D</b> E <b>M</b> F <b>S</b> P <b>Q</b> --E <b>A</b> A <b>A</b> Y <b>M</b> K <b>S</b> N                            |          |
| CG14062      | 117 Q <b>F</b> L <b>E</b> L <b>Y</b> R <b>A</b> C <b>F</b> D <b>T</b> R <b>A</b> V <b>R</b> A <b>I</b> F <b>V</b> E <b>H</b> R <b>V</b> Y <b>G</b> K <b>P</b> F <b>Y</b> I <b>T</b> R--P <b>C</b> V <b>Q</b> F <b>S</b> S <b>D</b> G <b>V</b> I <b>S</b> G <b>A</b> --D <b>E</b> A <b>S</b> Y <b>T</b> V <b>R</b> N                           |          |
| CG14120      | 163 -F <b>L</b> Q <b>S</b> Y <b>E</b> L <b>C</b> H <b>D</b> A <b>E</b> A <b>E</b> A <b>T</b> R <b>Y</b> V <b>H</b> H <b>V</b> L <b>P</b> S <b>S</b> Y <b>D</b> Y <b>Q</b> H <b>G</b> V <b>A</b> R <b>E</b> N <b>E</b> L <b>D</b> F <b>Y</b> G <b>G</b> R <b>D</b> V <b>N</b> T <b>K</b> Y <b>T</b> Q <b>V</b> Q <b>Q</b>                      |          |
| CG3819       | 162 R <b>F</b> A <b>T</b> Q <b>Y</b> E <b>V</b> C <b>F</b> N <b>E</b> D <b>E</b> E <b>V</b> T <b>R</b> Y <b>V</b> Y <b>H</b> R <b>L</b> E <b>P</b> G <b>N</b> Y <b>Y</b> A <b>T</b> G <b>V</b> D <b>R</b> I <b>T</b> F <b>G</b> A <b>G</b> G <b>Y</b> F <b>A</b> G <b>K</b> N <b>V</b> D <b>K</b> L <b>Y</b> T <b>Q</b> A <b>V</b> Q          |          |
| CG14118      | 181 R <b>F</b> V <b>A</b> T <b>M</b> E <b>L</b> C <b>H</b> D <b>P</b> N <b>Q</b> L <b>R</b> T <b>H</b> Y <b>A</b> H <b>H</b> Q <b>L</b> T <b>P</b> A <b>N</b> V <b>H</b> F <b>Q</b> K <b>L</b> K <b>R</b> P <b>R</b> F <b>S</b> T <b>A</b> G <b>H</b> F <b>I</b> C-----F <b>D</b> M <b>A</b> R                                                |          |
| CG6839       | 168 R <b>F</b> A <b>E</b> Q <b>M</b> Q <b>I</b> C <b>F</b> N <b>E</b> E <b>E</b> E <b>V</b> T <b>R</b> Y <b>T</b> R <b>H</b> K <b>L</b> E <b>P</b> G <b>S</b> N <b>Y</b> Y <b>E</b> T <b>G</b> V <b>A</b> R <b>I</b> T <b>F</b> Q <b>T</b> A <b>G</b> F <b>E</b> D <b>G</b> K <b>N</b> V <b>D</b> K <b>L</b> Y <b>T</b> Q <b>A</b> T <b>Q</b> |          |
|              |                                                                                                                                                                                                                                                                                                                                               |          |
| CG9989       | 169 A <b>Y</b> E <b>G</b> R <b>A</b> T <b>Q</b> A <b>C</b> L <b>L</b> T <b>N</b> L <b>G</b> A <b>V</b> Q <b>P</b> C <b>K</b> F <b>D</b> R <b>G</b> H <b>M</b> T <b>P</b> A <b>S</b> A <b>F</b> I <b>S</b> T <b>E</b> L <b>K</b> K <b>S</b> T <b>F</b> R <b>Y</b> L <b>N</b> A <b>I</b> P <b>Q</b> Y <b>R</b> G <b>V</b> N <b>R</b> G          |          |
| CG33346      | 67 I <b>Y</b> N <b>R</b> F <b>E</b> Y <b>L</b> F <b>G</b> S <b>G</b> Q <b>T</b> Y <b>V</b> P <b>S</b> S <b>R</b> S <b>L</b> S <b>F</b> D <b>R</b> G <b>H</b> L <b>T</b> P <b>V</b> A <b>D</b> Y <b>S</b> F <b>P</b> K <b>I</b> L <b>R</b> Q <b>T</b> N <b>K</b> Y <b>L</b> N <b>V</b> V <b>P</b> Q <b>Y</b> Y <b>N</b> I <b>N</b> R <b>S</b>  |          |
| CG12917      | 182 I <b>Y</b> F <b>A</b> F <b>K</b> C <b>I</b> Y <b>G</b> D <b>D</b> Q <b>S</b> Y <b>L</b> Q <b>N</b> A <b>N</b> Y <b>L</b> V <b>I</b> N <b>R</b> G <b>H</b> M <b>V</b> A <b>S</b> A <b>D</b> F <b>L</b> F <b>T</b> D <b>Q</b> M <b>G</b> S <b>T</b> F <b>R</b> Y <b>L</b> N <b>V</b> V <b>P</b> Q <b>F</b> K <b>S</b> I <b>N</b> D <b>G</b> |          |
| CG14062      | 173 I <b>H</b> G <b>T</b> F <b>R</b> R <b>L</b> F <b>G</b> N <b>N</b> Q <b>N</b> Y <b>I</b> P <b>N</b> N <b>R</b> D <b>V</b> I <b>N</b> R <b>G</b> H <b>L</b> A <b>A</b> S <b>A</b> D <b>E</b> F <b>F</b> G <b>D</b> Q <b>L</b> C <b>A</b> T <b>F</b> K <b>Y</b> V <b>N</b> A <b>Q</b> F <b>K</b> S <b>I</b> N <b>D</b> G                     |          |

CG14120 222 NITISNILGLDASPYFNFSDDRIISRGHMIAKTDQIFGAAQHTTELFINVAPOWQTFNNG  
CG3819 222 KETLDKELDMDSREFDSSAKNIFLARGHMGAKADEVFAPEQRATELFINAAPQWQTFNAG  
CG14118 234 IYSPKSQEKLMVPGLDVKSGLEFLARGHLTAKADLIYASQOKSSFNMYMNVAPQWQSFNGG  
CG6839 228 LETINNELGCGDAEKYFDSSSNVYLARGHLGAKADEDYAPEQRATELFINAAPQWQTFNAG

CG9989 229 KWKAVETWVNNMVRGLYDNPIINNVOIPRTYDVLKVCIGALGVHRLRHNTNNNMIPIYLL  
CG33346 127 NWKIVENWVR-----GQK----DVLNVCTGALGVLDLLNRSQKSVSIYLAP  
CG12917 242 NWEKIERWVR-----SQIPK-SSYFRVKSGGIGILTLPDTRGFLQSAFLAG  
CG14062 233 NWETIERFVR-----NSVTG-NNFVNVRTGARGVLSLPSGN-RPKNVFLSG  
CG14120 282 NWEKVETSVR-----KFAVDRNLTDCYTGTWGVSTLPDVDGIERELYLDF  
CG3819 282 NWARVEDGVR-----AWVAKENKHVECWTVGVVGV TLPNKNGEQRQLYLSH  
CG14118 294 QWSKLEESTR-----QYVARSGITATVYTGIIYG----EMKVAGSKVLHMTT  
CG6839 288 NWARVEDGLR-----AWVSKNKLNVNCYTGVYGVTTLPNKDGVETPLYLAV

CG9989 289 DNNK---IPVPEWMYKIVSHL-SGD-KWVMLTYND--VSLPNQQALNQICHVLPCHPGLN  
CG33346 169 NKN----PVPRTYKILRSL-TTGIKYVILTSNN--GWETQPNPASVCKVTACPTLN  
CG12917 287 SKI----PVPEWYKAVRDA-TGNGLYVFLTYNS--TFQMEKPPCLAICYPNCPHLP  
CG14062 277 NRN----PVPQWYKIVRNA-NNQPIVAFLLINN--IYARQRPAAPNFCQPVNCPVALV  
CG14120 328 DENNGLIPVPKLYFRVVIDRVIRE-GIVLIGINNPFYLTLEQIQKDYILCQDIGHQLSWL  
CG3819 328 DNNGNGLIPVPKLYFRVVIIEP-STKKGIVLIGVNNPHLSLEETKRDYILCTDVSDRINWI  
CG14118 336 NANNIGVVAVPQLFYRVLIDEGHPTRGIALVGVNNPHATLAQIHESYIICDPVEESVQWL  
CG6839 334 DDNNGNGLIPVPKLYFRVVIDP-SHRGIVFVGVNNPHLTEEQIKRDYVICDDVSDQVTYI

CG9989 342 -----LNTKDVCHTVCCDPYRFITINAPHLTGVC-----  
CG33346 221 -----PTG-TGYTFCCDPIDFIRRNVPNLAGVCWDNTENV  
CG12917 339 -----NNPNDGYTFCCDPKREFY-----  
CG14062 329 -----NTAQAGSFCNPAIFRP-----  
CG14120a 387 TWY----KEDLHEGYSYACSVEDFIEVVKDLPLEDLHTNGILG....  
CG3819 387 SWK----KTDITACYSYACEVPEFRKKVTHLPEFSVSGLLV--  
CG14118 396 SWLHKSNAKGNLKNGLYACSVANLARAVGHLPRPLLEVDELLT  
CG6839 393 NWK----TTDIKAGWSYACEVADELKTVKHLPALTAKGGLLV-
